# Supplementary material
Source: PubMed Central journal article supplement (PMC2442377)
Supplement: hesr0043-0693-SD2.pdf [file hesr0043-0693-SD2.pdf]

**APPENDIX**

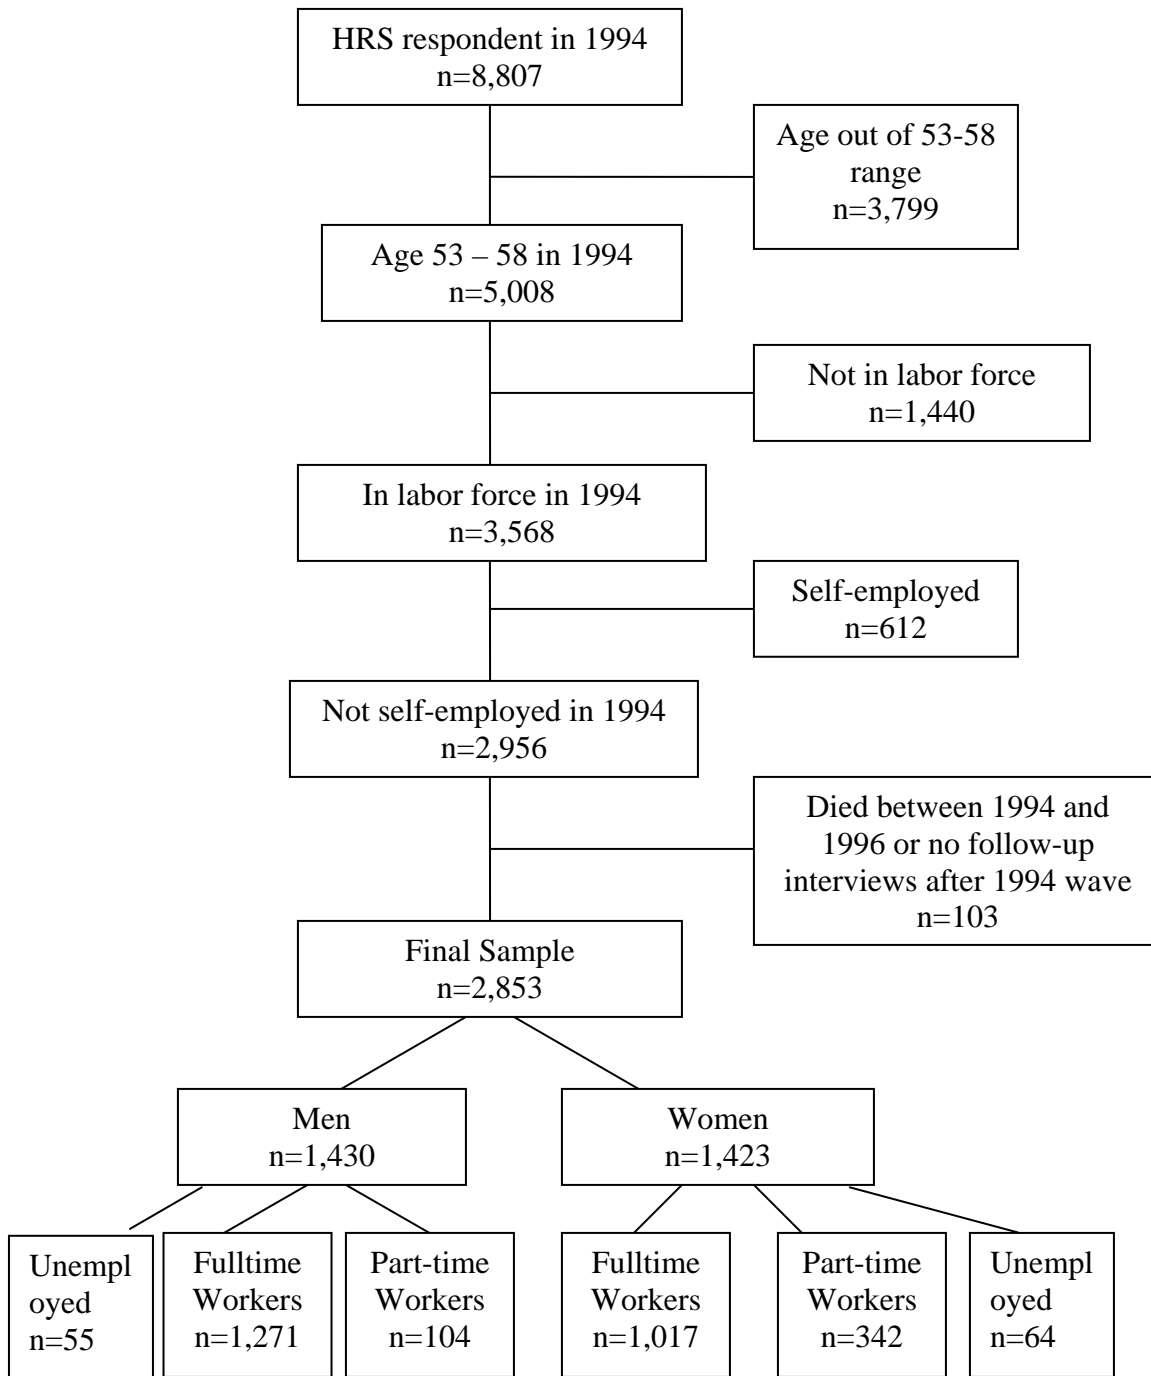

**Appendix Figure 1. Flow-chart of Study Sample Selection**

**Appendix Table 1. Discrete Logistic Regression Results in Men and Women in the Labor Force\***

| Characteristics                                | Men  |        |         | Women  |        |         |       |      |
|------------------------------------------------|------|--------|---------|--------|--------|---------|-------|------|
|                                                | OR   | 95% CI | p-value | OR     | 95% CI | p-value |       |      |
| <b>Active Depression</b>                       | 1.40 | 1.07   | 1.84    | 0.01   | 1.38   | 1.08    | 1.76  | 0.01 |
| <b>Age</b>                                     |      |        |         |        |        |         |       |      |
| 53-54                                          | 0.40 | 0.05   | 3.21    | 0.39   | 0.30   | 0.03    | 2.82  | 0.29 |
| 55-56                                          | 0.73 | 0.48   | 1.09    | 0.13   | 1.27   | 0.87    | 1.85  | 0.21 |
| 57-58                                          | 0.68 | 0.50   | 0.94    | 0.02   | 0.75   | 0.54    | 1.02  | 0.07 |
| 61-62                                          | 2.05 | 1.54   | 2.73    | <.0001 | 1.50   | 1.11    | 2.02  | 0.01 |
| 63-63                                          | 2.09 | 1.45   | 3.01    | <.0001 | 1.73   | 1.19    | 2.50  | 0.00 |
| 65-66                                          | 1.48 | 0.88   | 2.48    | 0.14   | 2.47   | 1.46    | 4.16  | 0.00 |
| <b>Marital Status</b>                          |      |        |         |        |        |         |       |      |
| Divorced/Separated                             | 1.48 | 1.08   | 2.03    | 0.02   | 0.98   | 0.71    | 1.37  | 0.92 |
| Single                                         | 0.76 | 0.38   | 1.53    | 0.44   | 1.35   | 0.80    | 2.28  | 0.26 |
| Widow                                          | 2.24 | 1.18   | 4.25    | 0.01   | 1.19   | 0.84    | 1.70  | 0.33 |
| <b>Race/Ethnicity</b>                          |      |        |         |        |        |         |       |      |
| Black                                          | 0.89 | 0.61   | 1.28    | 0.52   | 0.82   | 0.60    | 1.14  | 0.24 |
| Other                                          | 0.55 | 0.26   | 1.18    | 0.12   | 0.89   | 0.44    | 1.82  | 0.75 |
| Hispanic                                       | 1.10 | 0.74   | 1.64    | 0.64   | 0.85   | 0.55    | 1.30  | 0.44 |
| <b>Geographical Region</b>                     |      |        |         |        |        |         |       |      |
| Northeast                                      | 0.91 | 0.67   | 1.24    | 0.56   | 1.16   | 0.86    | 1.58  | 0.34 |
| South                                          | 0.99 | 0.76   | 1.30    | 0.96   | 1.28   | 0.96    | 1.70  | 0.10 |
| Midwest                                        | 0.92 | 0.69   | 1.22    | 0.55   | 0.92   | 0.67    | 1.26  | 0.59 |
| <b>Education</b>                               |      |        |         |        |        |         |       |      |
| High School Graduate                           | 0.84 | 0.63   | 1.11    | 0.22   | 0.69   | 0.52    | 0.93  | 0.02 |
| Some College                                   | 0.68 | 0.49   | 0.95    | 0.02   | 0.60   | 0.42    | 0.85  | 0.00 |
| College Graduate                               | 0.47 | 0.31   | 0.69    | 0.00   | 0.54   | 0.35    | 0.82  | 0.00 |
| <b>Not Full Time Worker in baseline survey</b> | 1.68 | 1.22   | 2.32    | 0.00   | 0.97   | 0.76    | 1.24  | 0.81 |
| <b>Type of Industry</b>                        |      |        |         |        |        |         |       |      |
| Manufacturing & Transportation                 | 1.08 | 0.77   | 1.52    | 0.64   | 2.41   | 0.86    | 6.74  | 0.09 |
| Wholesale & Retail                             | 0.69 | 0.45   | 1.05    | 0.08   | 1.38   | 0.50    | 3.83  | 0.53 |
| Services                                       | 0.80 | 0.53   | 1.19    | 0.27   | 1.72   | 0.62    | 4.74  | 0.30 |
| Professional/Related Svcs                      | 0.74 | 0.48   | 1.13    | 0.16   | 1.70   | 0.62    | 4.65  | 0.30 |
| Public Administration                          | 0.81 | 0.49   | 1.33    | 0.40   | 1.43   | 0.48    | 4.29  | 0.52 |
| Unknown                                        | 0.39 | 0.08   | 1.83    | 0.23   | 3.95   | 0.77    | 20.22 | 0.10 |
| <b>Type of Occupation</b>                      |      |        |         |        |        |         |       |      |
| Service                                        | 0.98 | 0.67   | 1.43    | 0.90   | 1.03   | 0.77    | 1.39  | 0.85 |
| Farming & Construction                         | 0.87 | 0.58   | 1.30    | 0.49   | 2.90   | 0.59    | 14.20 | 0.19 |
| Operators                                      | 0.82 | 0.64   | 1.07    | 0.14   | 1.04   | 0.71    | 1.52  | 0.83 |

|                                                       |      |      |      |        |      |      |      |        |
|-------------------------------------------------------|------|------|------|--------|------|------|------|--------|
| <b>Years of Tenure on Current Job</b>                 |      |      |      |        |      |      |      |        |
| 2-4 years                                             | 0.67 | 0.47 | 0.95 | 0.03   | 0.60 | 0.42 | 0.86 | 0.01   |
| 5-9 years                                             | 0.53 | 0.37 | 0.76 | 0.00   | 0.66 | 0.47 | 0.93 | 0.02   |
| 10-19 years                                           | 0.71 | 0.50 | 1.01 | 0.05   | 0.65 | 0.47 | 0.91 | 0.01   |
| 20 or more years                                      | 1.09 | 0.79 | 1.50 | 0.60   | 0.81 | 0.57 | 1.14 | 0.23   |
| <b>Medical Conditions</b>                             |      |      |      |        |      |      |      |        |
| Arthritis                                             | 1.04 | 0.86 | 1.27 | 0.68   | 1.19 | 0.98 | 1.45 | 0.07   |
| Cancer                                                | 1.24 | 0.79 | 1.93 | 0.35   | 0.98 | 0.70 | 1.36 | 0.90   |
| Diabetes                                              | 0.94 | 0.69 | 1.27 | 0.67   | 1.19 | 0.84 | 1.70 | 0.33   |
| Heart Disease                                         | 1.23 | 0.95 | 1.60 | 0.12   | 1.01 | 0.71 | 1.43 | 0.97   |
| Hypertension                                          | 1.03 | 0.85 | 1.25 | 0.78   | 1.22 | 1.00 | 1.50 | 0.05   |
| Chronic Lung Disease                                  | 1.72 | 1.20 | 2.48 | 0.00   | 0.92 | 0.61 | 1.39 | 0.70   |
| Stroke                                                | 1.08 | 0.59 | 1.98 | 0.79   | 1.55 | 0.79 | 3.05 | 0.20   |
| <b>Housing Value</b>                                  |      |      |      |        |      |      |      |        |
| Less than \$0                                         | 1.28 | 0.93 | 1.76 | 0.12   | 1.14 | 0.84 | 1.54 | 0.40   |
| \$50k-\$150k                                          | 1.24 | 0.98 | 1.58 | 0.08   | 1.23 | 0.96 | 1.58 | 0.11   |
| More than \$150k                                      | 1.54 | 1.09 | 2.17 | 0.01   | 1.14 | 0.80 | 1.63 | 0.47   |
| <b>Non-housing Value</b>                              |      |      |      |        |      |      |      |        |
| Less than \$0                                         | 0.65 | 0.38 | 1.11 | 0.11   | 1.03 | 0.64 | 1.64 | 0.91   |
| \$10k-\$50k                                           | 0.95 | 0.69 | 1.30 | 0.74   | 1.09 | 0.80 | 1.48 | 0.60   |
| \$50k-\$100k                                          | 0.65 | 0.45 | 0.95 | 0.02   | 0.99 | 0.68 | 1.45 | 0.96   |
| \$100k-\$200k                                         | 1.02 | 0.71 | 1.48 | 0.90   | 1.10 | 0.75 | 1.61 | 0.64   |
| More than \$200k                                      | 1.19 | 0.82 | 1.73 | 0.37   | 1.78 | 1.23 | 2.58 | 0.00   |
| <b>Weekly Wage</b>                                    |      |      |      |        |      |      |      |        |
| \$300-\$500                                           | 0.81 | 0.59 | 1.12 | 0.20   | 0.74 | 0.57 | 0.95 | 0.02   |
| \$500-\$800                                           | 0.91 | 0.67 | 1.23 | 0.53   | 1.04 | 0.76 | 1.40 | 0.83   |
| \$800-\$1500                                          | 0.86 | 0.62 | 1.19 | 0.36   | 0.87 | 0.58 | 1.32 | 0.51   |
| More than \$1500                                      | 0.57 | 0.36 | 0.92 | 0.02   | 0.63 | 0.28 | 1.43 | 0.27   |
| <b>Ratio of respondent income to household income</b> |      |      |      |        |      |      |      |        |
|                                                       | 1.00 | 0.99 | 1.00 | 0.20   | 1.00 | 0.99 | 1.00 | 0.52   |
| <b>Health Insurance Benefits*</b>                     |      |      |      |        |      |      |      |        |
| ESHI without RHI                                      | 0.63 | 0.50 | 0.79 | <.0001 | 0.84 | 0.65 | 1.08 | 0.18   |
| Other HI, No ESHI (with RHI)                          | 0.74 | 0.49 | 1.13 | 0.17   | 0.98 | 0.72 | 1.33 | 0.88   |
| Other HI, No ESHI (without RHI)                       | 1.04 | 0.74 | 1.47 | 0.82   | 0.98 | 0.72 | 1.33 | 0.88   |
| No HI                                                 | 0.96 | 0.62 | 1.50 | 0.87   | 1.04 | 0.71 | 1.53 | 0.85   |
| <b>Activities of Daily Living</b>                     |      |      |      |        |      |      |      |        |
|                                                       | 1.86 | 1.23 | 2.82 | 0.00   | 1.60 | 1.04 | 2.45 | 0.03   |
| <b>Instrumental Activities of Daily Living</b>        |      |      |      |        |      |      |      |        |
|                                                       | 1.26 | 0.77 | 2.07 | 0.35   | 1.36 | 0.77 | 2.39 | 0.29   |
| <b>Social Security Eligibility</b>                    |      |      |      |        |      |      |      |        |
| Yes                                                   | 0.64 | 0.50 | 0.82 | 0.00   | 0.56 | 0.45 | 0.69 | <.0001 |
| <b>Type of Pension Availability</b>                   |      |      |      |        |      |      |      |        |
| Defined Contribution                                  | 0.66 | 0.50 | 0.87 | 0.00   | 0.73 | 0.55 | 0.97 | 0.03   |
| Defined Benefits and Contribution                     | 1.11 | 0.86 | 1.42 | 0.43   | 0.75 | 0.55 | 1.03 | 0.08   |

|                         |      |      |      |      |      |      |      |      |
|-------------------------|------|------|------|------|------|------|------|------|
| None/Unknown            | 0.63 | 0.46 | 0.87 | 0.00 | 0.77 | 0.58 | 1.01 | 0.06 |
| <b>Observation year</b> |      |      |      |      |      |      |      |      |
| 1998                    | 0.94 | 0.69 | 1.28 | 0.69 | 0.94 | 0.69 | 1.29 | 0.71 |
| 2000                    | 0.96 | 0.67 | 1.37 | 0.82 | 1.09 | 0.76 | 1.56 | 0.64 |
| 2002                    | 1.36 | 0.90 | 2.06 | 0.15 | 1.05 | 0.68 | 1.64 | 0.82 |

---

Reference categories listed in order of the characteristics include: No active depression, ages 59-60, married, white, West, not high school graduate, full time worker in 1992, industry including agriculture/forest/fishing/mining/construction, occupation including managerial specialty/professionals/sales & office staff, < 2 years tenure on job, housing value \$0 to <\$50K, non-housing value \$0-<\$10k, weekly wage < \$300k, ESHI with RHI, no activities of daily living, no instrumental activities of daily living, not eligible for social security, defined benefits, observation year 1996.

**Appendix Table 2. Odds Ratios for Retirement\* by Depression Status based on Analyses truncating Follow up after 6-years**

| Depression Status                   | Men                   |              |                     |              | Women                 |              |                     |              |
|-------------------------------------|-----------------------|--------------|---------------------|--------------|-----------------------|--------------|---------------------|--------------|
|                                     | Unadjusted Odds Ratio | (95% CI)     | Adjusted Odds Ratio | (95% CI)     | Unadjusted Odds Ratio | (95% CI)     | Adjusted Odds Ratio | (95% CI)     |
| <b>All Labor Force Participants</b> |                       |              |                     |              |                       |              |                     |              |
| <b>Active depression†</b>           |                       |              |                     |              |                       |              |                     |              |
| No                                  | 1.00                  |              | 1.00                |              | 1.00                  |              | 1.00                |              |
| Yes                                 | 1.73**                | (1.31, 2.27) | 1.46**              | (1.06, 2.02) | 1.43**                | (1.12, 1.83) | 1.37**              | (1.04, 1.81) |
| <b>Severity of depression‡</b>      |                       |              |                     |              |                       |              |                     |              |
| None                                | 1.00                  |              | 1.00                |              | 1.00                  |              | 1.00                |              |
| Sub-threshold                       | 1.32**                | (1.05, 1.65) | 1.17                | (0.91, 1.50) | 1.44**                | (1.15, 1.82) | 1.45**              | (1.13, 1.86) |
| Active                              | 1.90**                | (1.43, 2.54) | 1.57**              | (1.12, 2.21) | 1.65**                | (1.27, 2.16) | 1.63**              | (1.20, 2.21) |
| <b>Full-time workers</b>            |                       |              |                     |              |                       |              |                     |              |
| <b>Active depression†</b>           |                       |              |                     |              |                       |              |                     |              |
| No                                  | 1.00                  |              | 1.00                |              | 1.00                  |              | 1.00                |              |
| Yes                                 | 1.41**                | (1.06, 1.87) | 1.36                | (0.98, 1.87) | 1.21                  | (0.92, 1.58) | 1.17                | (0.86, 1.58) |
| <b>Severity of depression‡</b>      |                       |              |                     |              |                       |              |                     |              |
| None                                | 1.00                  |              | 1.00                |              | 1.00                  |              | 1.00                |              |
| Sub-threshold                       | 1.02                  | (0.82, 1.27) | 0.96                | (0.75, 1.21) | 1.20                  | (0.93, 1.53) | 1.26                | (0.96, 1.65) |
| Active                              | 1.42**                | (1.06, 1.90) | 1.33                | (0.95, 1.86) | 1.29                  | (0.97, 1.72) | 1.29                | (0.93, 1.78) |

\* Includes respondents who reported becoming partially retired, part-time working, or unemployed.

\*\*Significantly different at 0.05 level from the no depression group

† no: CESD score < 3; yes: CESD score ≥ 3

‡ none: CESD score =0; sub-threshold: CESD score= 1-2; active: CESD score ≥ 3

**Appendix Table 3. Odds Ratios for Retirement\* by Depression Status based on Analyses truncating Follow up after 4-years**

| Depression Status                   | Men                   |              |                     |              | Women                 |              |                     |              |
|-------------------------------------|-----------------------|--------------|---------------------|--------------|-----------------------|--------------|---------------------|--------------|
|                                     | Unadjusted Odds Ratio | (95% CI)     | Adjusted Odds Ratio | (95% CI)     | Unadjusted Odds Ratio | (95% CI)     | Adjusted Odds Ratio | (95% CI)     |
| <b>All Labor Force Participants</b> |                       |              |                     |              |                       |              |                     |              |
| <b>Active depression†</b>           |                       |              |                     |              |                       |              |                     |              |
| No                                  | 1.00                  |              | 1.00                |              | 1.00                  |              | 1.00                |              |
| Yes                                 | 2.07**                | (1.49, 2.88) | 1.61**              | (1.09, 2.38) | 1.66**                | (1.24, 2.23) | 1.61**              | (1.15, 2.27) |
| <b>Severity of depression‡</b>      |                       |              |                     |              |                       |              |                     |              |
| None                                | 1.00                  |              | 1.00                |              | 1.00                  |              | 1.00                |              |
| Sub-threshold                       | 1.22                  | (0.92, 1.63) | 1.11                | (0.81, 1.52) | 1.18                  | (0.88, 1.57) | 1.10                | (0.81, 1.51) |
| Active                              | 2.21**                | (1.57, 3.12) | 1.68**              | (1.11, 2.55) | 1.76**                | (1.28, 2.40) | 1.68**              | (1.17, 2.43) |
| <b>Full-time workers</b>            |                       |              |                     |              |                       |              |                     |              |
| <b>Active depression†</b>           |                       |              |                     |              |                       |              |                     |              |
| No                                  | 1.00                  |              | 1.00                |              | 1.00                  |              | 1.00                |              |
| Yes                                 | 1.85**                | (1.33, 2.56) | 1.71**              | (1.16, 2.52) | 1.28                  | (0.92, 1.77) | 1.27                | (0.88, 1.83) |
| <b>Severity of depression‡</b>      |                       |              |                     |              |                       |              |                     |              |
| None                                | 1.00                  |              | 1.00                |              | 1.00                  |              | 1.00                |              |
| Sub-threshold                       | 0.97                  | (0.73, 1.28) | 0.94                | (0.70, 1.27) | 1.18                  | (0.88, 1.59) | 1.19                | (0.86, 1.66) |
| Active                              | 1.83**                | (1.30, 2.56) | 1.67**              | (1.12, 2.50) | 1.35                  | (0.96, 1.90) | 1.37                | (0.93, 2.01) |

\* Includes respondents who reported becoming partially retired, part-time working, or unemployed.

\*\*Significantly different at 0.05 level from the no depression group

† no: CESD score < 3; yes: CESD score ≥ 3

‡ none: CESD score =0; sub-threshold: CESD score= 1-2; active: CESD score ≥ 3
